# Supplementary material for: How photo editing in social media shapes self-perceived attractiveness and self-esteem via self-objectification and physical appearance comparisons
Source: PubMed Central journal article supplement (PMC10080933; doi:10.1186/s40359-023-01143-0), 2023-04-06
Supplement: 40359_2023_1143_MOESM1_ESM.pdf [file 40359_2023_1143_MOESM1_ESM.pdf]

## APPENDIX C: INTERCORRELATIONS

|               | (1)      | (2)       | (3)     | (4)     | (5)     | (6)     | (7)     | (8)     | (9)    | (10) |
|---------------|----------|-----------|---------|---------|---------|---------|---------|---------|--------|------|
| (1) IAQ       | -        |           |         |         |         |         |         |         |        |      |
| (2) Active    | .921**   | -         |         |         |         |         |         |         |        |      |
| (3) Passive   | .586**   | .373**    | -       |         |         |         |         |         |        |      |
| (4) PES       | .358**   | .207**    | .223**  | -       |         |         |         |         |        |      |
| (5) SOBBS     | .286**   | .223**    | .219**  | .221**  | -       |         |         |         |        |      |
| (6) SOBBS: F1 | .298**   | .213**    | .256**  | .227**  | .931**  | -       |         |         |        |      |
| (7) SOBBS: F2 | .176**   | .168**    | .099**  | .124**  | .809**  | .562**  | -       |         |        |      |
| (8) PACS      | .264**   | .174**    | .222**  | .238**  | .722**  | .717**  | .533**  | -       |        |      |
| (9) BES: A    | -.127**  | -.069 ns. | -.135** | -.146** | -.599** | -.569** | -.477** | -.536** | -      |      |
| (10) RSES     | -.081ns. | -.044 ns. | -.092*  | -.137** | -.455** | -.390** | -.423** | -.368** | .604** | -    |

Note. Df = 401, IAQ = Instagram Activity Questionnaire, PES = Photo-Editing Scale, SOBBS = Self-Objectification Beliefs and Behaviors Scale, PACS = Physical Appearance Comparison Scale, BES: A = Body Esteem Scale: Appearance, RSES = Rosenberg Self-Esteem Scale
